# Supplementary material for: Intrinsic-water desorption induced thermomechanical response of hydrogels
Source: Royal Society of Chemistry journal article supplement (doi:10.1039/d2sm01054b), 2022-01-01
Supplement: d2sm01054b1.pdf [file d2sm01054b1.pdf]

Supplementary Materials for  
**Intrinsic-water desorption induced  
thermomechanical response of hydrogels**

Sanghamitra Debta<sup>1</sup>, Sonam Zangpo Bhutia<sup>1,2</sup>, Dillip K. Satapathy <sup>\*2</sup>, and  
Pijush Ghosh<sup>†1</sup>

<sup>1</sup>Department of Applied Mechanics, Indian Institute of Technology Madras,  
Chennai 600036, India

<sup>2</sup>Soft Materials Laboratory, Department of Physics, IIT Madras, Chennai -  
600036, India

## 1 Experimental details

---

<sup>1</sup>These authors contributed equally to this work.

\*Corresponding Author: dks@iitm.ac.in

†Corresponding Author: pijush@iitm.ac.in

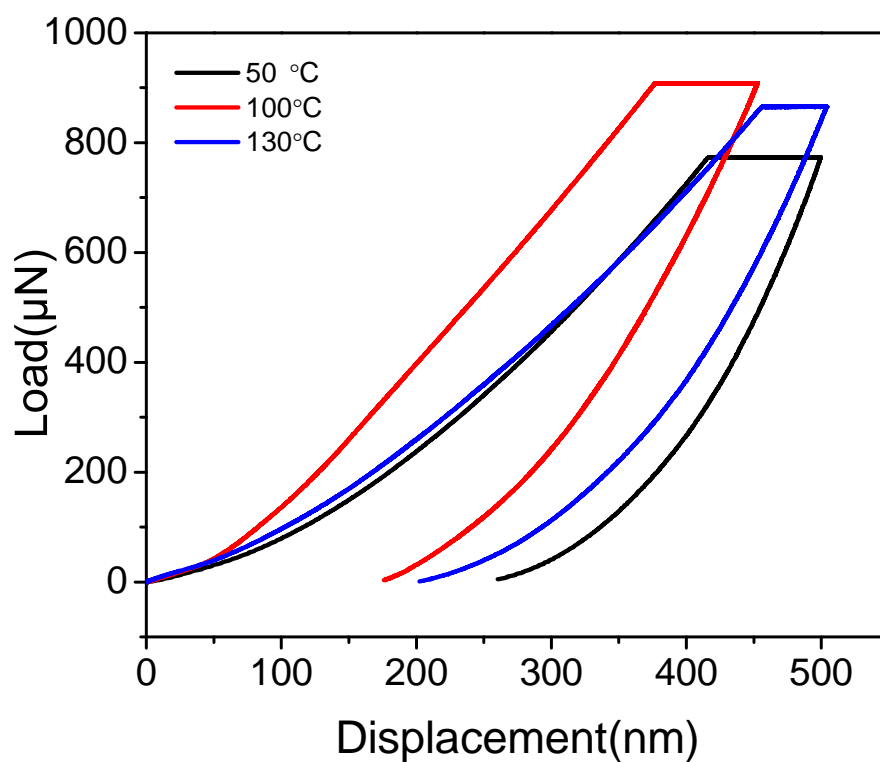

Figure S1: Load-Displacement plots of crosslinked-chitosan films measured at various temperatures as independent experiments. The thickness of the films is about 100  $\mu\text{m}$ .

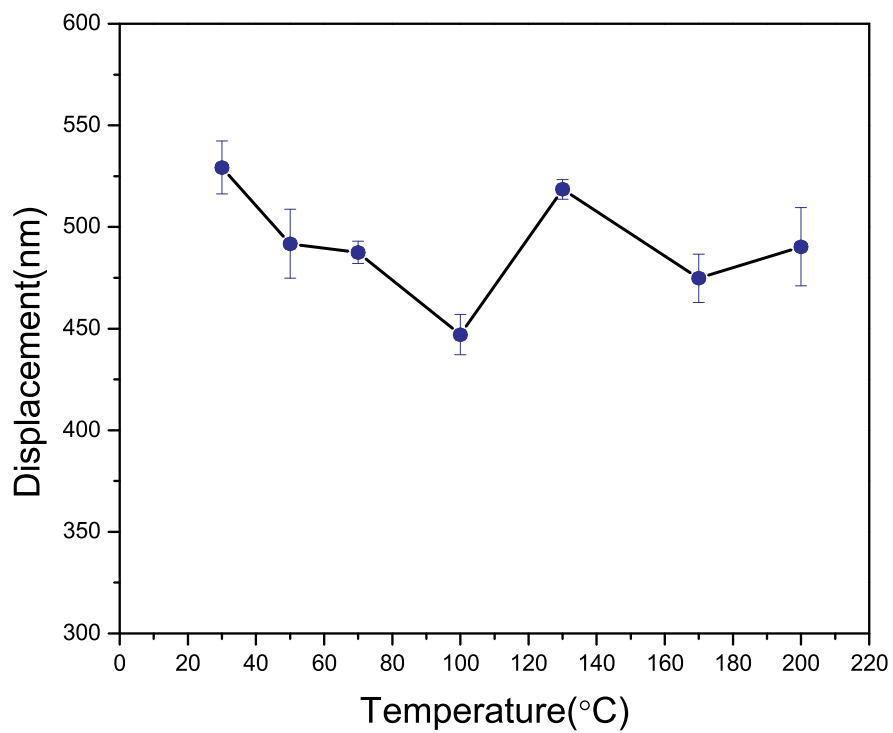

Figure S2: Maximum displacement of the indenter at the peak load at various temperatures. The thickness of the films is about 100  $\mu\text{m}$ .

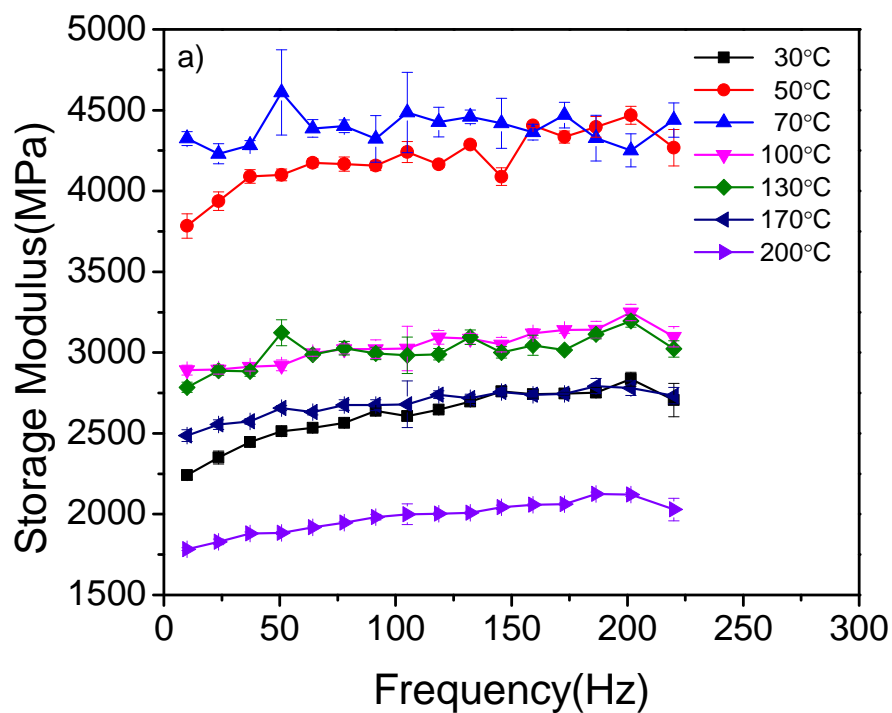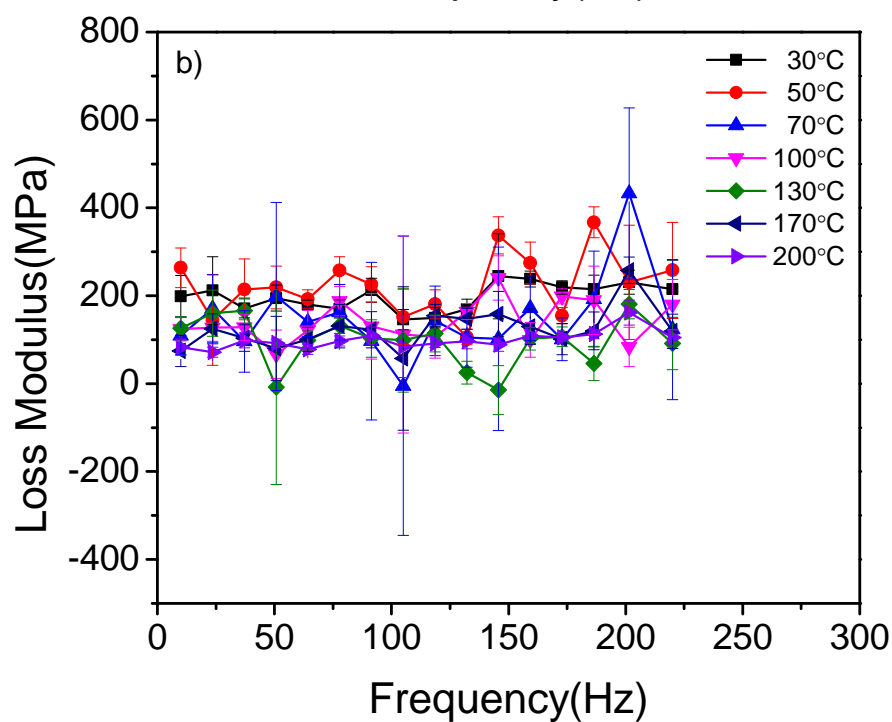

Figure S3: (a) Storage modulus obtained at different temperatures for frequency range of (10-210) Hz and (b) Loss modulus at different temperatures for frequency range of (10-210) Hz These are obtained from the nano DMA experiments.
